# Supplementary material for: New approach of modifying the anatase to rutile transition temperature in TiO2 photocatalysts
Source: Royal Society of Chemistry journal article supplement (doi:10.1039/c6ra19759k), 2016-01-01
Supplement: c6ra19759k1.pdf [file c6ra19759k1.pdf]

## New Approach of Modifying the Anatase to Rutile Transition Temperature in TiO<sub>2</sub> Photocatalysts

Received 00th January 20xx,  
Accepted 00th January 20xx

Ciara Byrne<sup>a,b</sup>, Rachel Fagan<sup>c,d</sup>, Steven Hinder<sup>e</sup>, Declan E. McCormack<sup>c,d</sup> and Suresh C. Pillai<sup>a,b</sup>

DOI: 10.1039/x0xx00000x

www.rsc.org/

### Supplementary Information

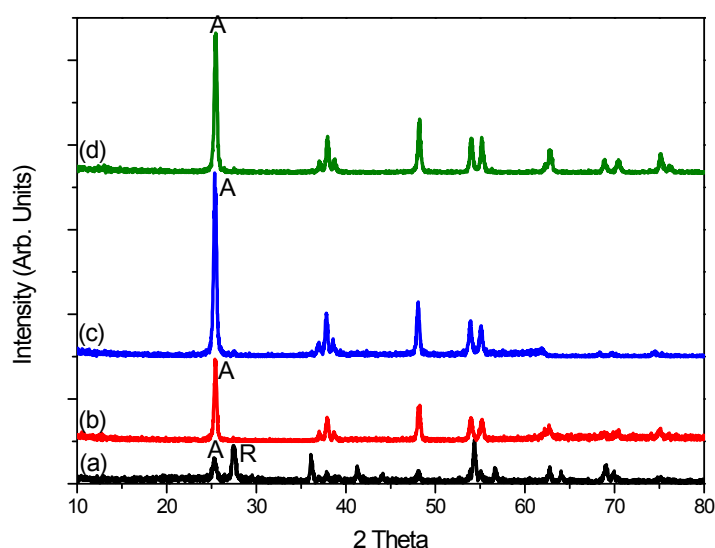

Figure S1: XRD of all concentrations that have been calcined at 600 °C. (a) Undoped TiO<sub>2</sub> (b) 1:1 TiO<sub>2</sub>: Benzoic Acid (c) 1:4 TiO<sub>2</sub>: Benzoic Acid and (d) 1:8 TiO<sub>2</sub>: Benzoic Acid. A= anatase and R = rutile.

<sup>a</sup> Nanotechnology Research Group, Department of Environmental Science, School of Science, Institute of Technology Sligo, Ash Lane, Sligo, Ireland

<sup>b</sup> Centre for Precision Engineering, Materials and Manufacturing Research (PEM), Institute of Technology Sligo, Ash Lane, Sligo, Ireland.

<sup>c</sup> Centre for Research in Engineering Surface Technology (CREST), FOCAS Institute, Dublin Institute of Technology, Kevin St., Dublin 8, Ireland.

<sup>d</sup> School of Chemical and Pharmaceutical Sciences, Dublin Institute of Technology, Kevin St., Dublin 8, Ireland

<sup>e</sup> The Surface Analysis Laboratory Faculty of Engineering & Physical Sciences, University of Surrey, Guildford, Surrey, GU2 7XH, United Kingdom

† Corresponding author. E-mail address: [pillai.suresh@itsligo.ie](mailto:pillai.suresh@itsligo.ie).

Electronic Supplementary Information (ESI) available: [details of any supplementary information available should be included here]. See DOI: 10.1039/x0xx00000x

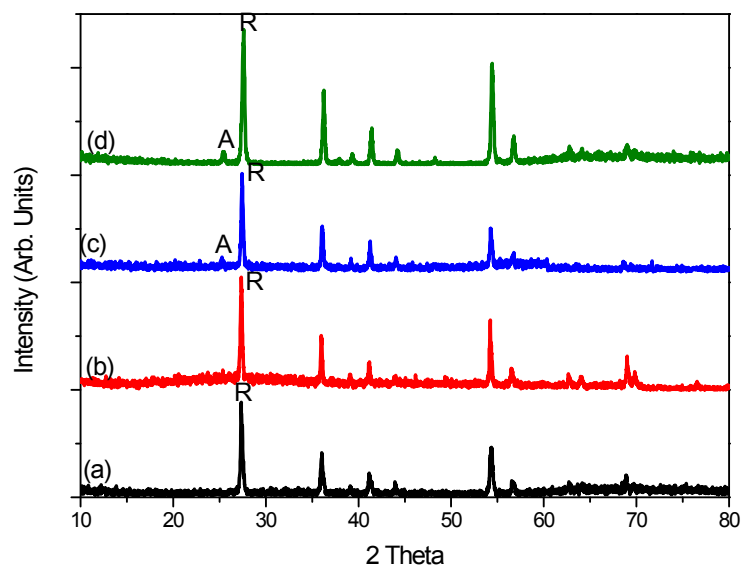

Figure S2: XRD of all samples which have been calcined at 800 °C. (a) Undoped TiO<sub>2</sub> (b) 1:1 TiO<sub>2</sub>: Benzoic Acid (c) 1:4 TiO<sub>2</sub>: Benzoic Acid and (d) 1:8 TiO<sub>2</sub>: Benzoic Acid. A= anatase and R = rutile

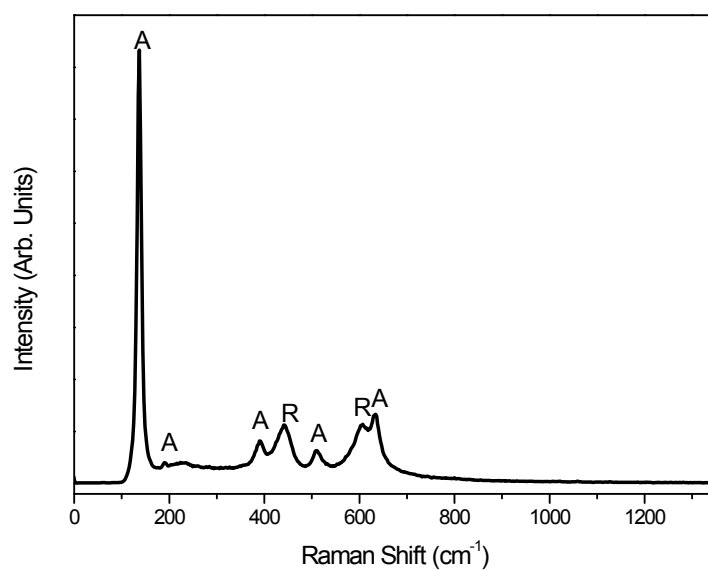

Figure S3: Raman spectra of the 1:1 TiO<sub>2</sub>: benzoic acid sample calcined at 700 °C, A = anatase and R = rutile

Table S1: XPS results showing the binding energies (eV) for samples at 600 °C, 700 °C and 800 °C

|                        | Control        | 1:1            | 1:4            | 1:8            |
|------------------------|----------------|----------------|----------------|----------------|
| <b>C<sub>1s</sub></b>  | 600 °C – 285.0 |
|                        | 700 °C – 285.0 |
|                        | 800 °C – 285.0 |
| <b>O<sub>1s</sub></b>  | 600 °C – 530.2 | 600 °C – 530.2 | 600 °C – 530.2 | 600 °C – 530.0 |
|                        | 700 °C – 529.8 | 700 °C – 530.0 | 700 °C – 530.2 | 700 °C – 529.8 |
|                        | 800 °C – 530.0 | 800 °C – 529.8 | 800 °C – 530.0 | 800 °C – 529.8 |
| <b>Ti<sub>2p</sub></b> | 600 °C – 459.0 | 600 °C – 459.0 | 600 °C – 459.0 | 600 °C – 458.8 |
|                        | 700 °C – 458.8 | 700 °C – 458.8 | 700 °C – 458.8 | 700 °C – 458.6 |
|                        | 800 °C – 458.6 | 800 °C – 458.6 | 800 °C – 458.8 | 800 °C – 458.6 |

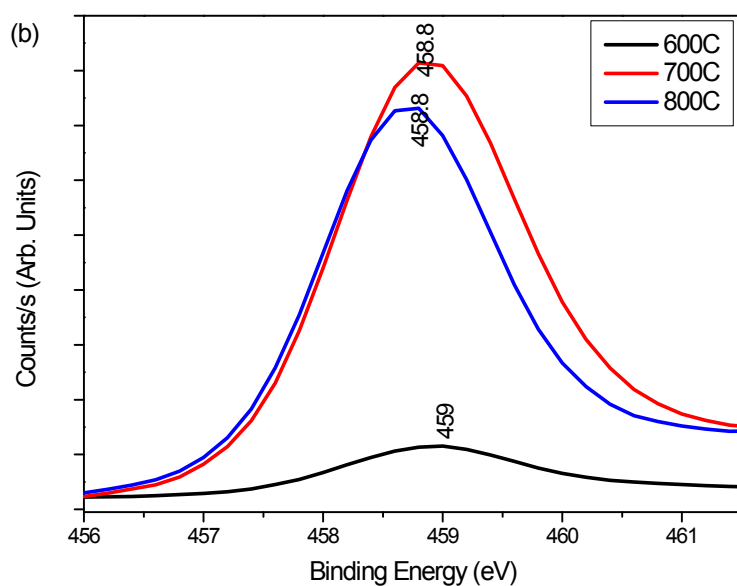Figure S4: XPS of 1:4 TiO<sub>2</sub>: benzoic acid at 600 °C, 700 °C and 800 °C for Ti<sub>2p 1/2</sub>

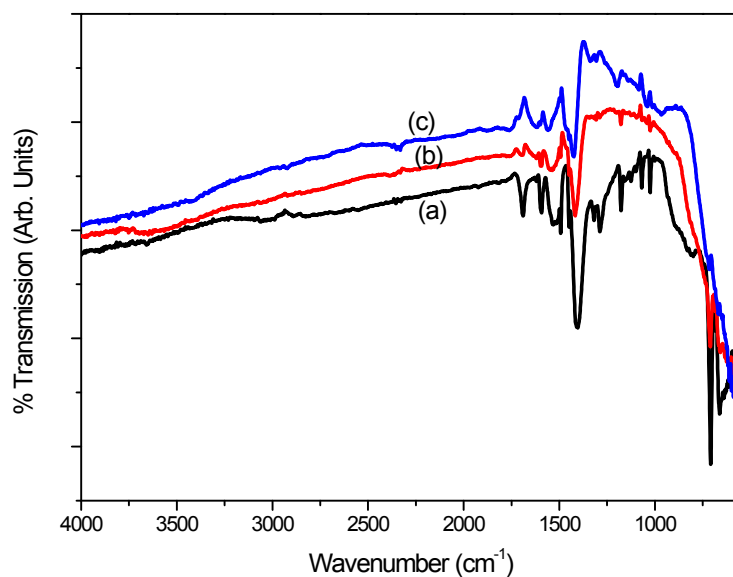

Figure S5: FTIR spectra of the 1:4 TiO<sub>2</sub>: benzoic acid for (a) uncalcined, (b) 500 °C and (c) 900 °C

All 1:8 samples contained very weak Ti-O-Ti peaks, uncalcined at 556cm<sup>-1</sup>, 500 °C at 530cm<sup>-1</sup> and 900 °C at 534cm<sup>-1</sup>. The uncalcined and 500 °C samples both showed the presence of benzene ring(s), with a medium peak at 1036cm<sup>-1</sup> for uncalcined and a weak peak at 1025cm<sup>-1</sup> for the sample calcined to 500 °C. There is also a peak at 1287cm<sup>-1</sup> in the uncalcined sample for a carboxyl group (COOH) and one at 1319cm<sup>-1</sup> that indicates the presence of C-OH and is not present in the other samples. The uncalcined sample contains a strong C-O symmetric stretch (1403cm<sup>-1</sup>), while 500 °C shows a medium C-O symmetric stretch (1416cm<sup>-1</sup>) and at 900 °C a very weak C-O symmetric stretch (1427cm<sup>-1</sup>). There are vibrations of carboxylate moieties at 500 °C (1538cm<sup>-1</sup>). There are also peaks that show asymmetric C-O stretches, for uncalcined at 1590cm<sup>-1</sup> and 1690cm<sup>-1</sup> (medium) and for 500°C at 1590cm<sup>-1</sup> and 1690cm<sup>-1</sup> (weak).

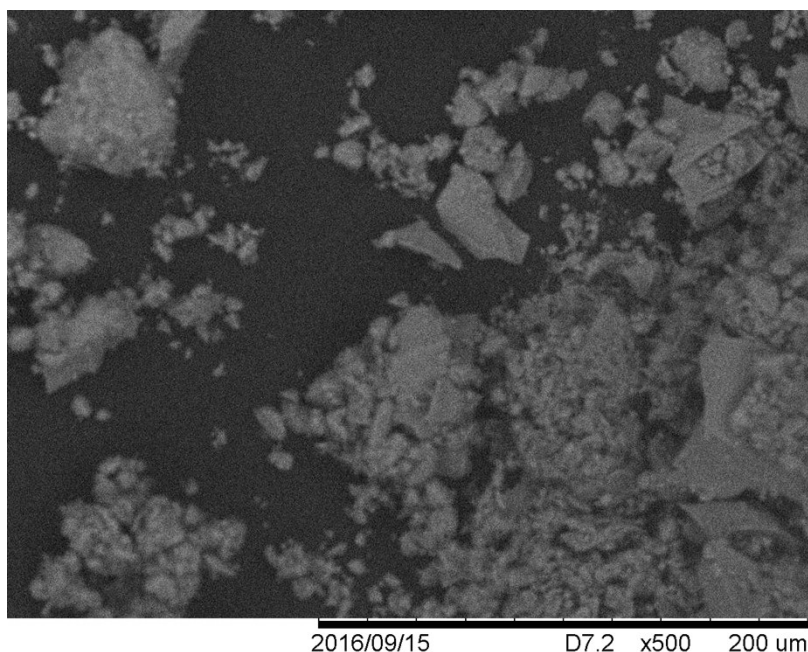

Figure S6: SEM of 1:4 TiO<sub>2</sub>: benzoic acid @ 500°C
